# Supplementary material for: Phenotypic Characterization and Comparative Genomics of the Melanin-Producing Yeast Exophiala lecanii-corni Reveals a Distinct Stress Tolerance Profile and Reduced Ribosomal Genetic Content
Source: MDPI journal article supplement (doi:10.3390/jof7121078), 2021-12-15
Supplement: s1 [file s1]

YPD

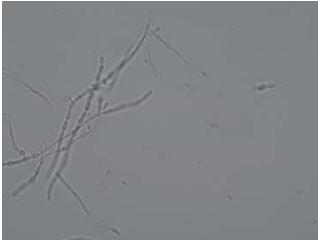

MM

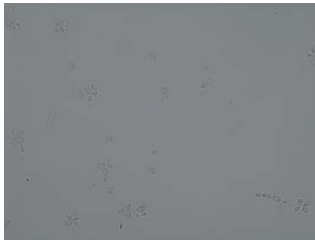

Supplemental Figure S1: microscopic imaging dimorphic phenotypes of melanin-deficient mutant *Elcpks1Δ* in YPD and MM
